# Supplementary material for: Maternal Factors Associated with Non-Exclusive Breastfeeding in Haitian Immigrant Women in Southern Chile
Source: MDPI journal article supplement (doi:10.3390/nu14153173), 2022-08-02

Figure S1. Forest plot based on odds ratios of maternal factors associated with non-exclusive breastfeeding of Haitian immigrant women in southern Chile.

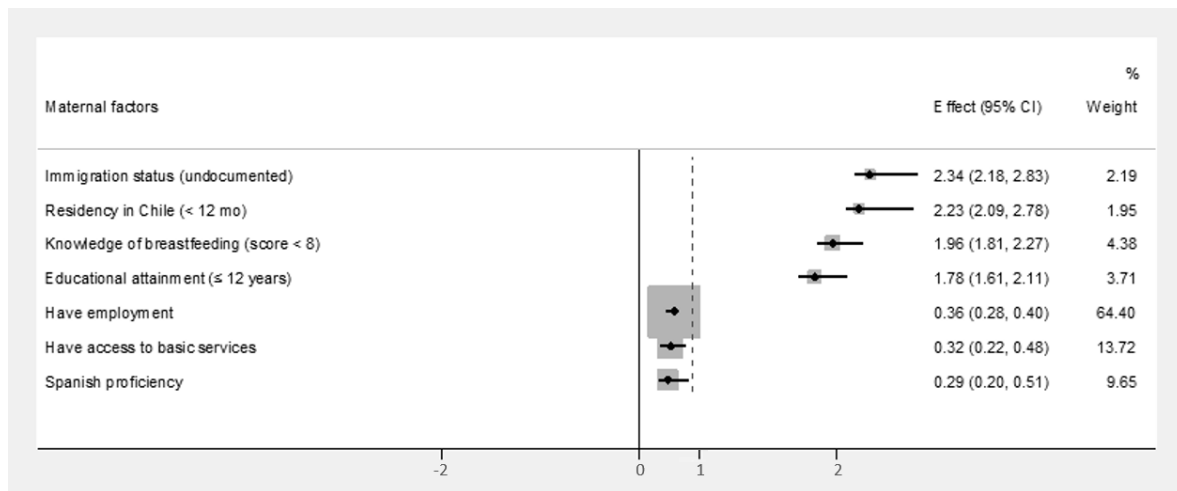

Supplement: s1 [file s1]
